# Supplementary material for: Aliphatic/aromatic spacers based azo dye dimers: synthesis and application for optical storage devices
Source: Royal Society of Chemistry journal article supplement (doi:10.1039/c4ra08219b), 2014-09-18

## Supplementary information

### 1. Compound E1

#### (a) FTIR – Spectra

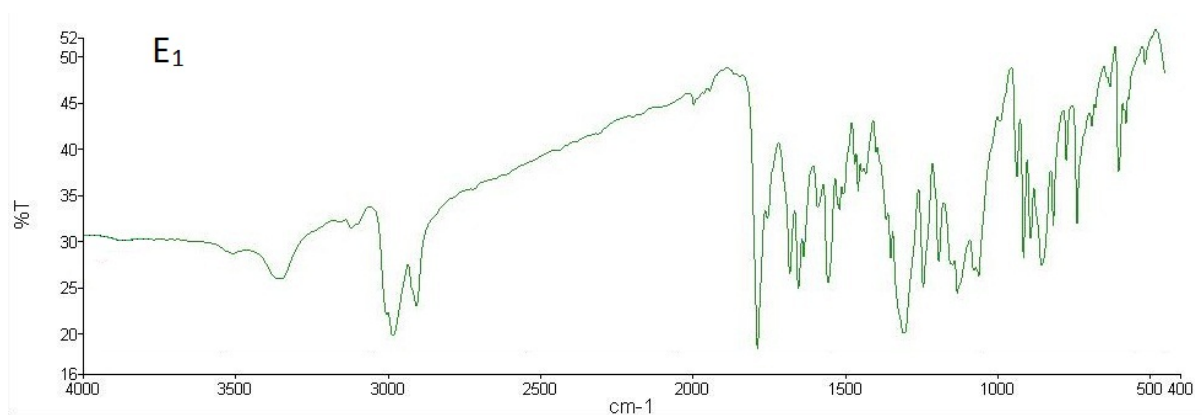

#### (b) <sup>1</sup>H-NMR

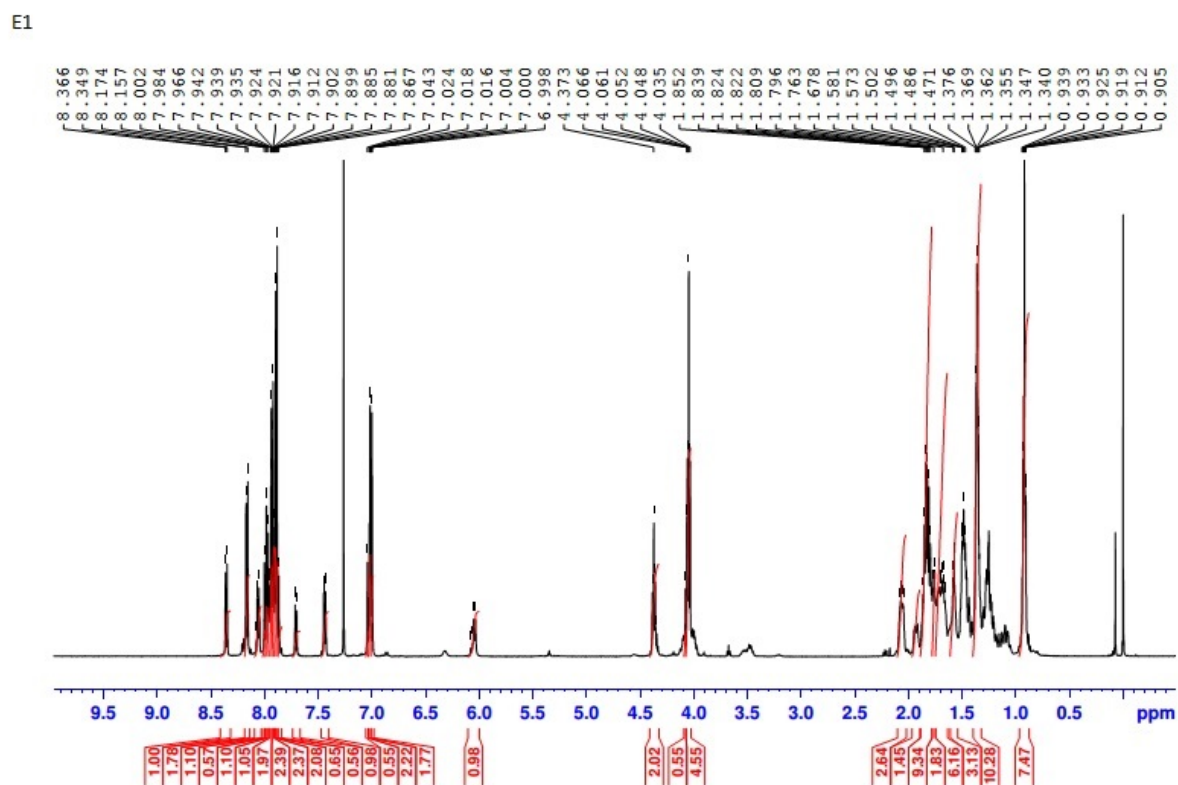

E1: Aliphatic region

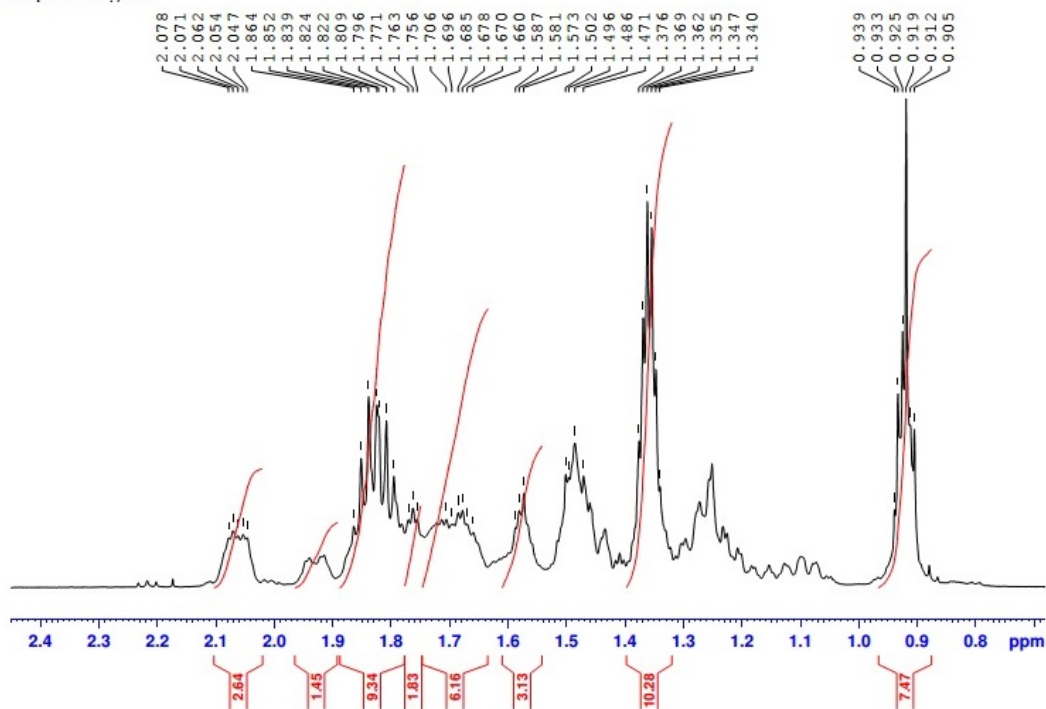

E1 Aromatic region

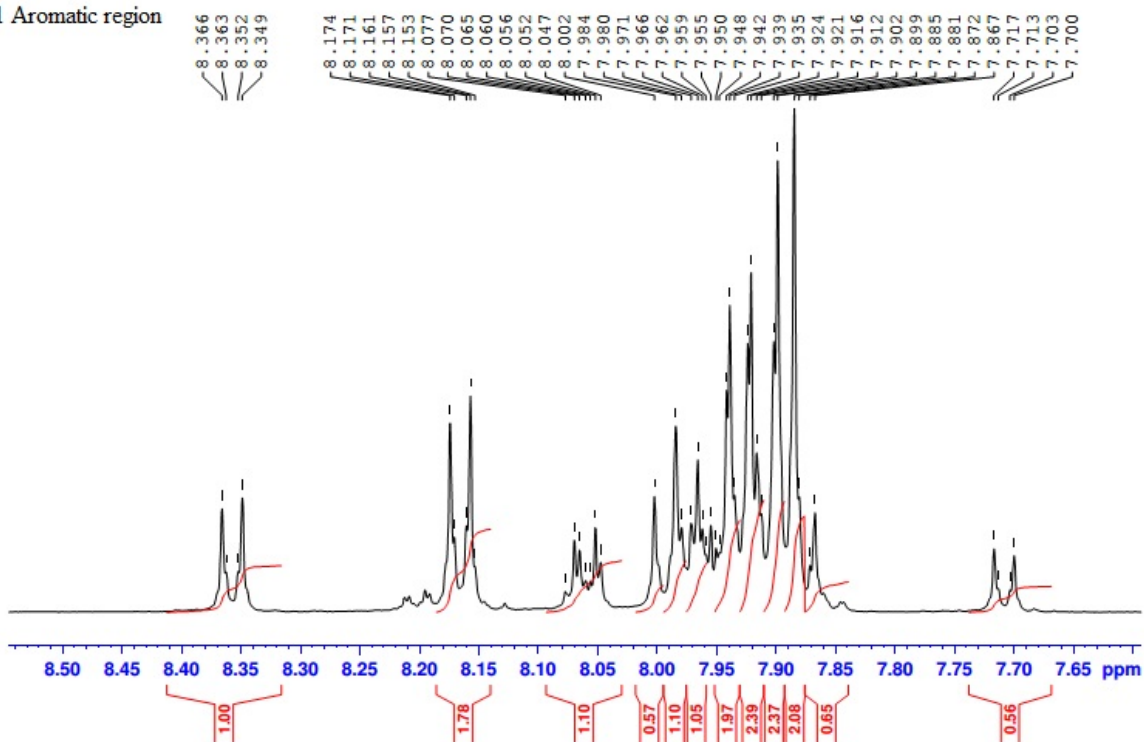

(c)  $^{13}\text{C}$ -NMR

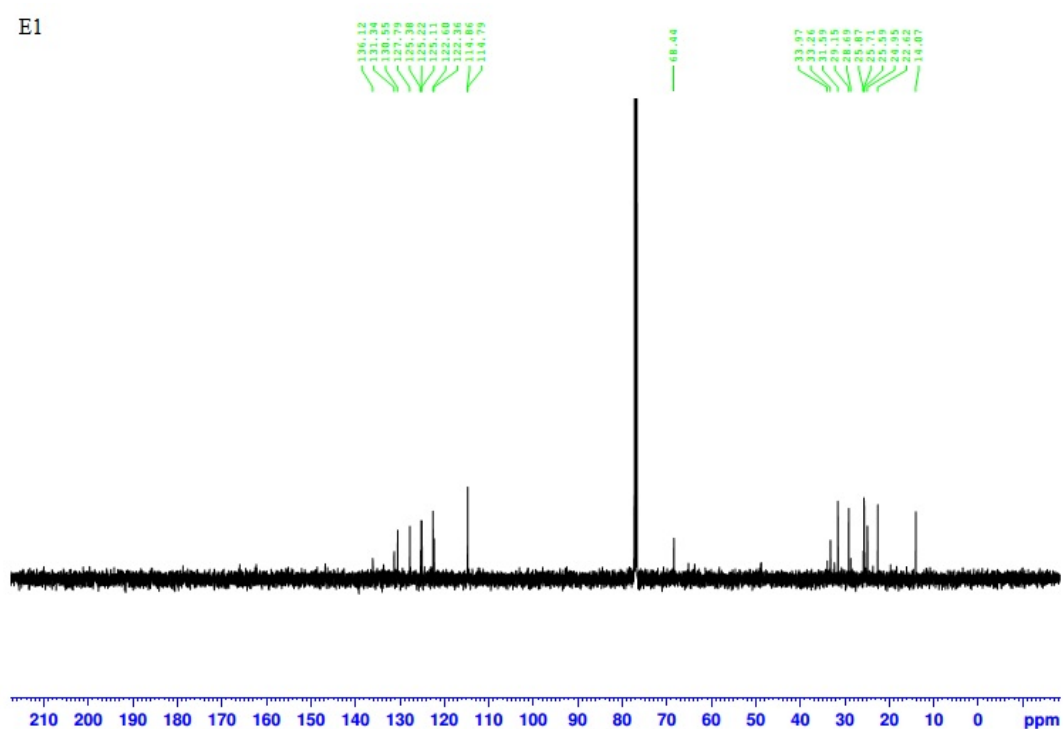

2. Compound E2

(a) FTIR – Spectra

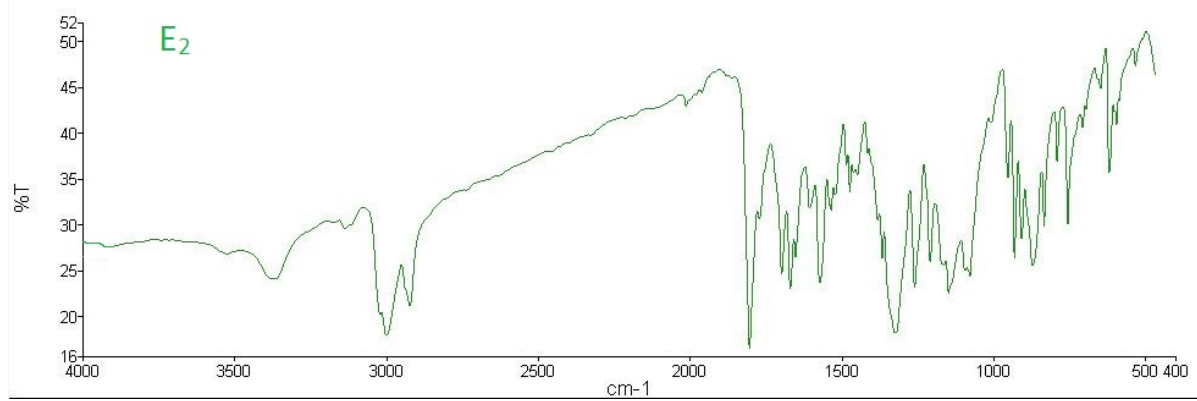

(b)  $^1\text{H}$ -NMR

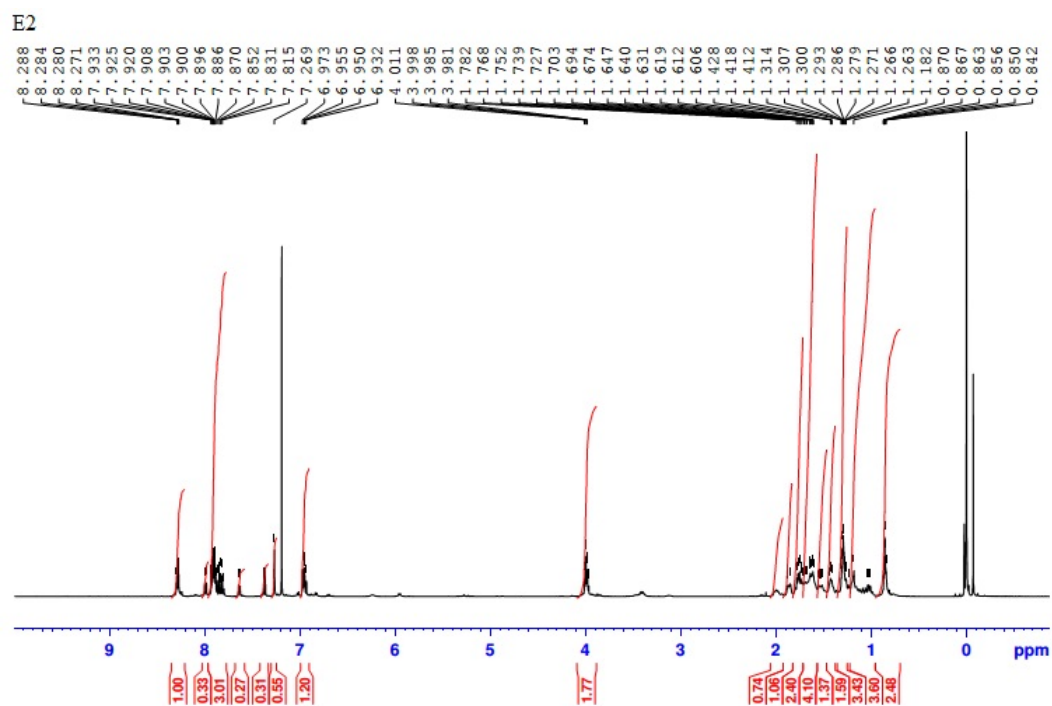

E2: Aliphatic region

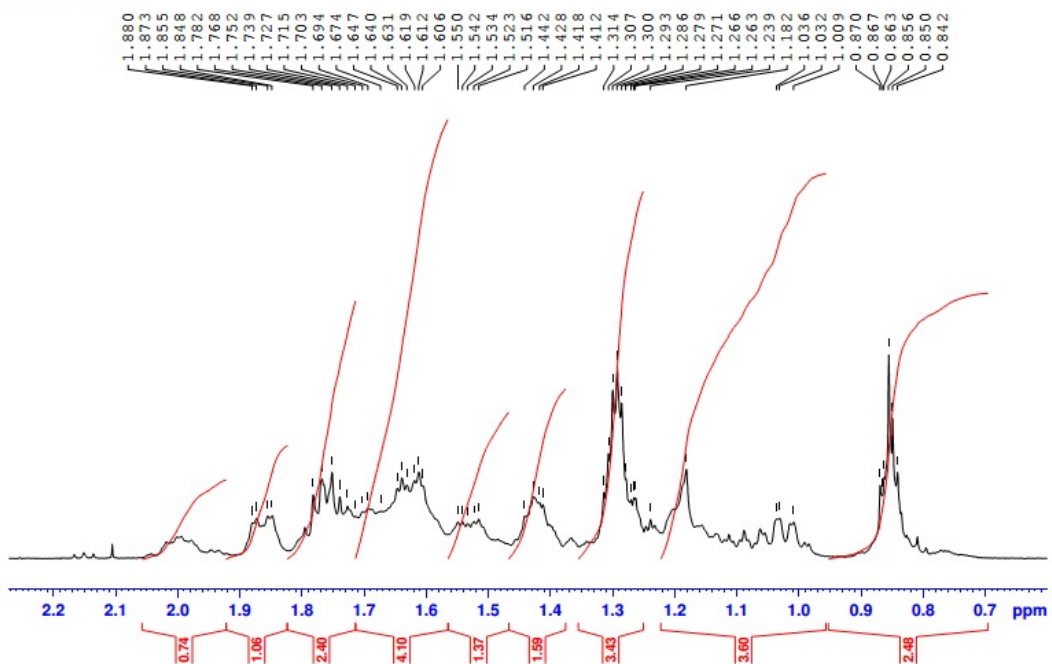

E2: Aromatic region

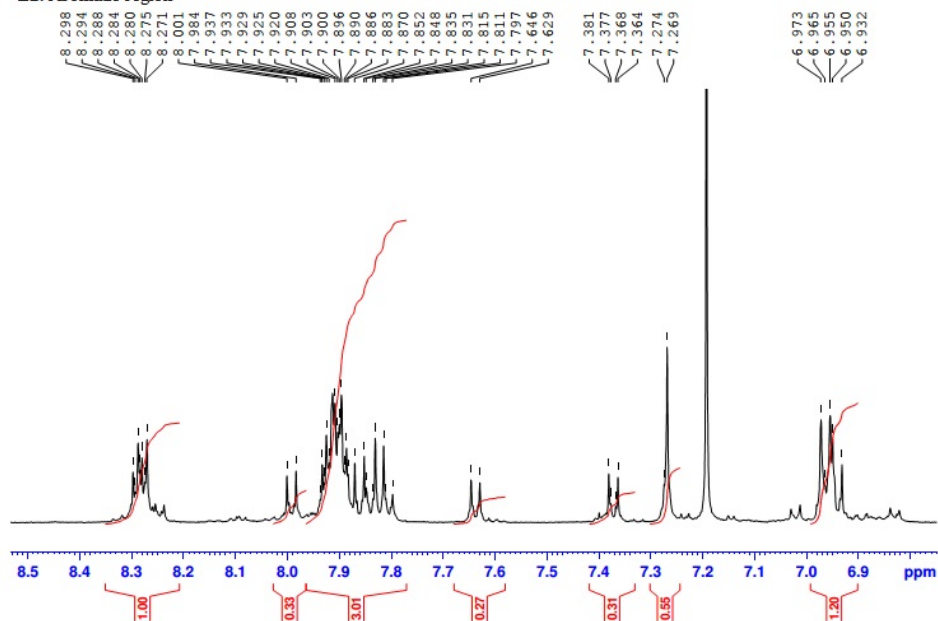

(c)  $^{13}\text{C}$ -NMR

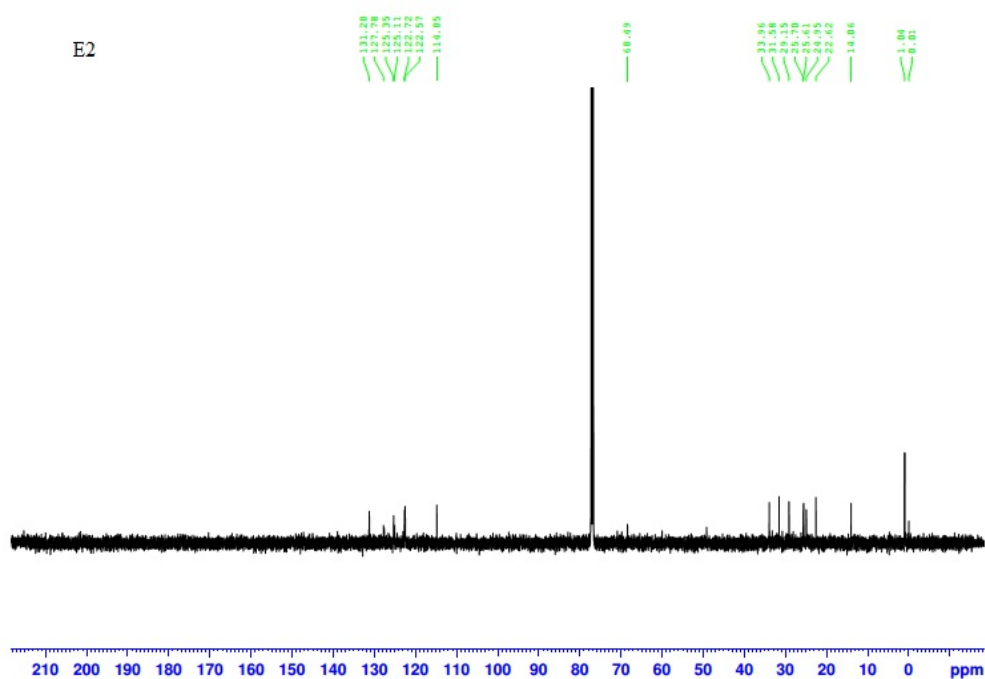

Supplement: c4ra08219b1.pdf [file c4ra08219b1.pdf]
